# Supplementary material for: Synthesis, Crystal Structure and Biological Activity of 2-Hydroxyethylammonium Salt of p-Aminobenzoic Acid
Source: PubMed Central journal article supplement (PMC4108362; doi:10.1371/journal.pone.0101892), 2014-07-23
Supplement: pone.0101892.s001.pdf [file pone.0101892.s001.pdf]

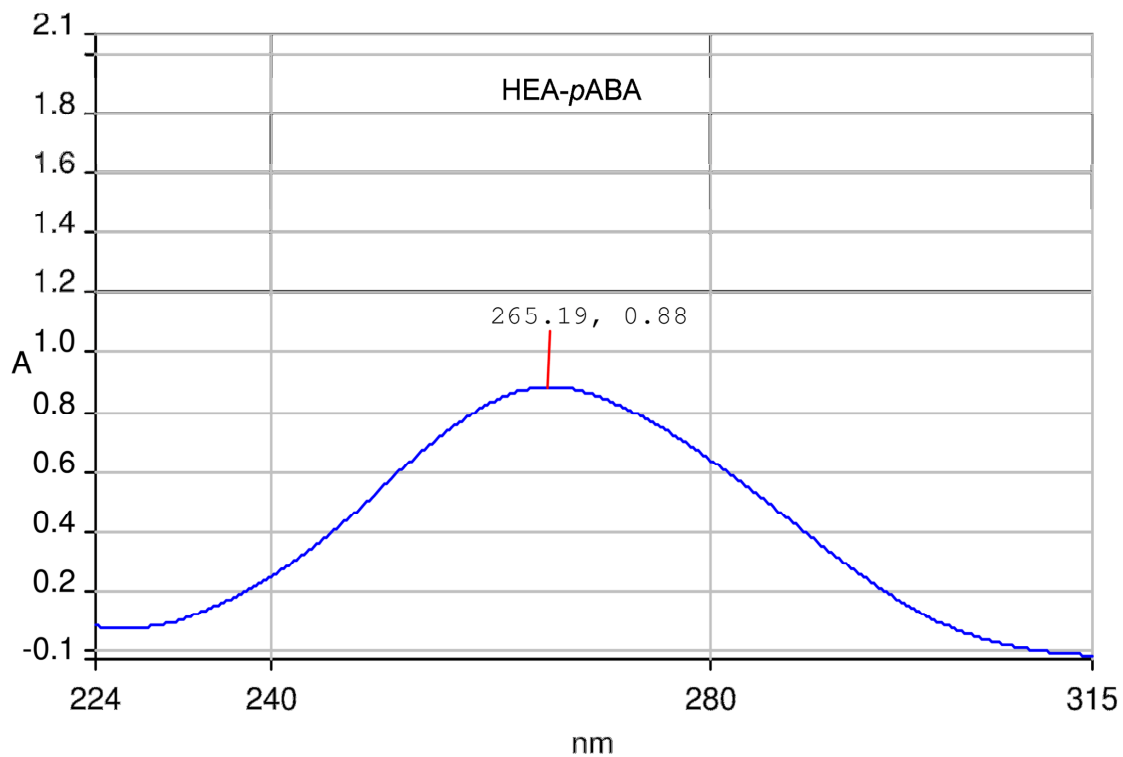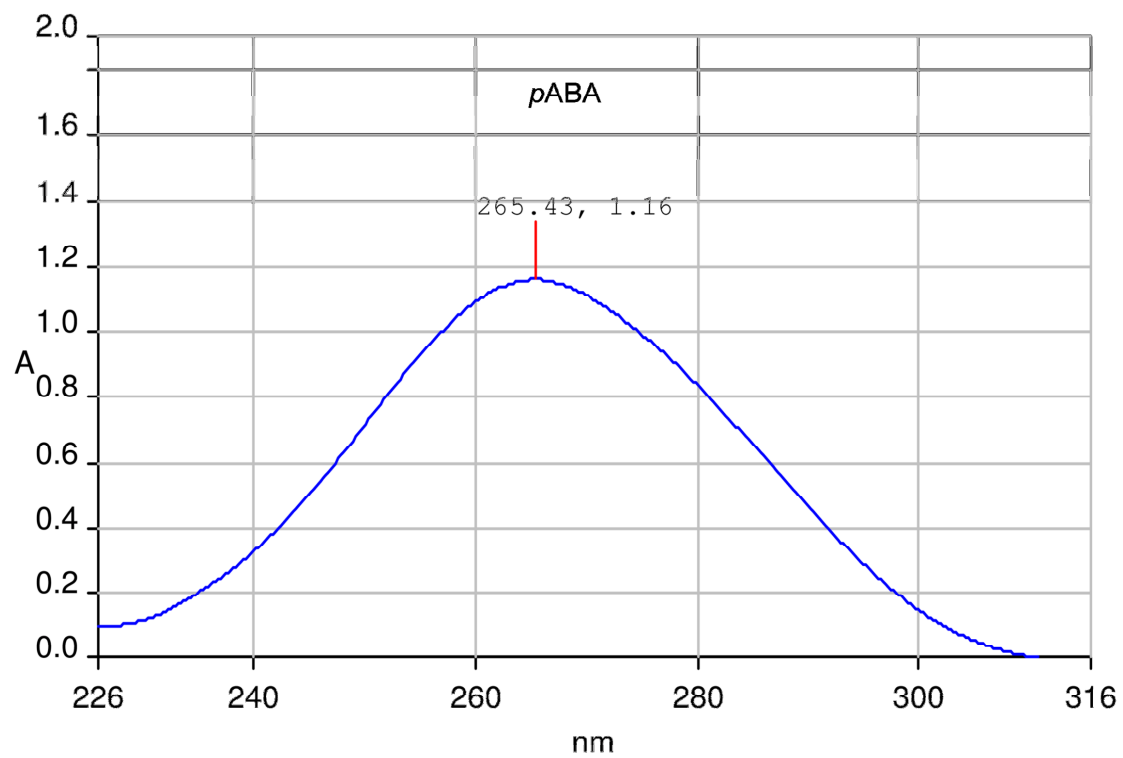

**Figure S1. UV absorption spectra of HEA-pABA and pABA in 0.1 M NaOH solution.**
