# Supplementary material for: Synthesis, Crystal Structure and Biological Activity of 2-Hydroxyethylammonium Salt of p-Aminobenzoic Acid
Source: PubMed Central journal article supplement (PMC4108362; doi:10.1371/journal.pone.0101892), 2014-07-23
Supplement: pone.0101892.s002.pdf [file pone.0101892.s002.pdf]

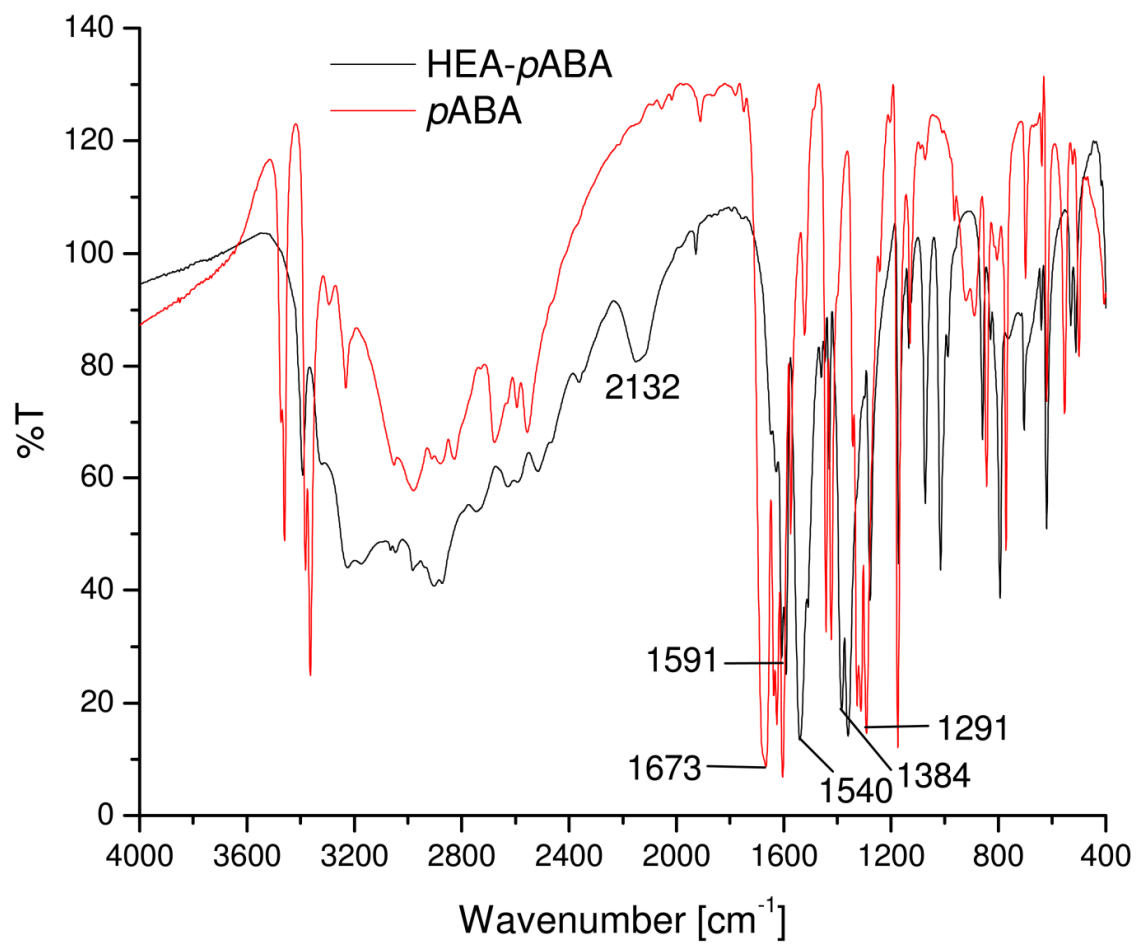

Figure S2. FT-IR spectra of HEA-*p*ABA (black) and *p*ABA (red).
