# Supplementary material for: Synthesis, Crystal Structure and Biological Activity of 2-Hydroxyethylammonium Salt of p-Aminobenzoic Acid
Source: PubMed Central journal article supplement (PMC4108362; doi:10.1371/journal.pone.0101892), 2014-07-23
Supplement: pone.0101892.s003.pdf [file pone.0101892.s003.pdf]

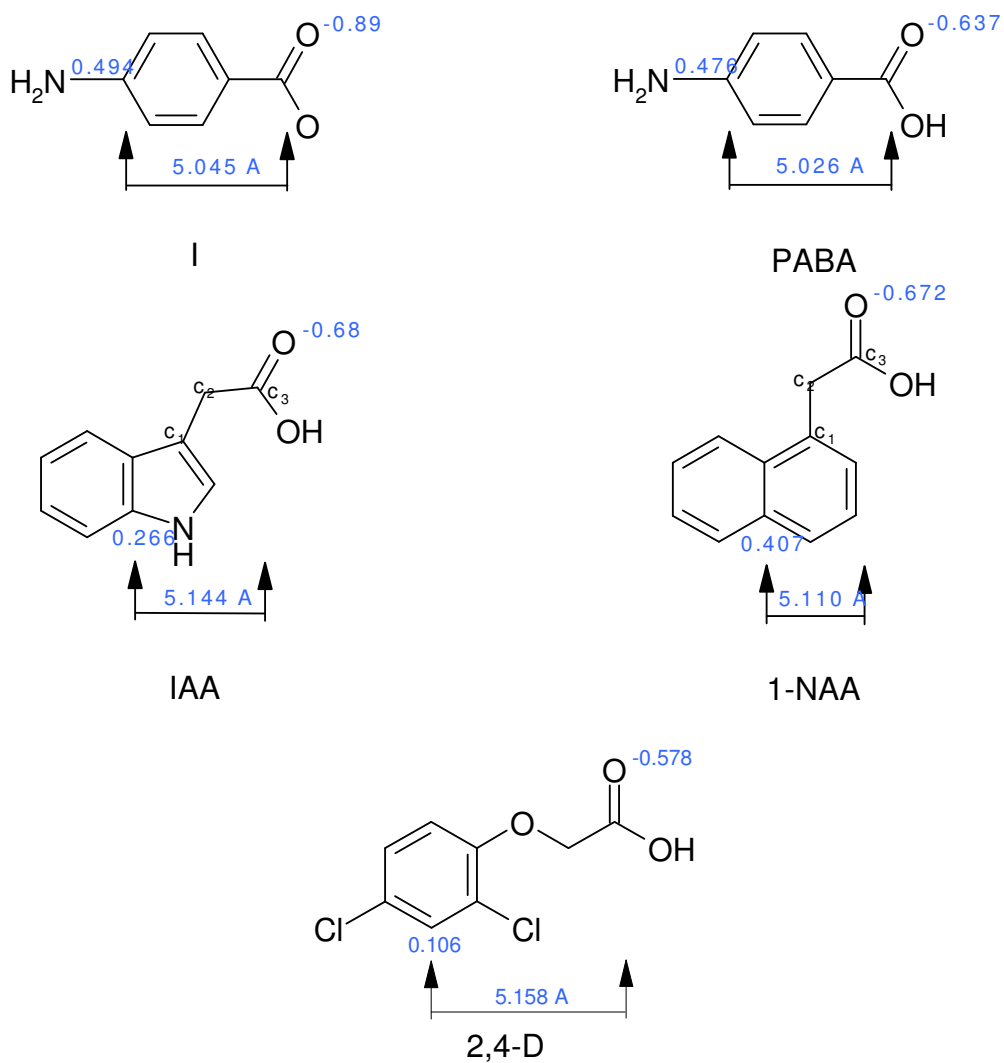

**Figure S3. Optimal distance calculation for HEA-*p*ABA, *p*ABA and classical auxin molecules (IAA, 1-NAA, 2,4-D).**
