# Supplementary material for: Synthesis, Crystal Structure and Biological Activity of 2-Hydroxyethylammonium Salt of p-Aminobenzoic Acid
Source: PubMed Central journal article supplement (PMC4108362; doi:10.1371/journal.pone.0101892), 2014-07-23
Supplement: pone.0101892.s004.pdf [file pone.0101892.s004.pdf]

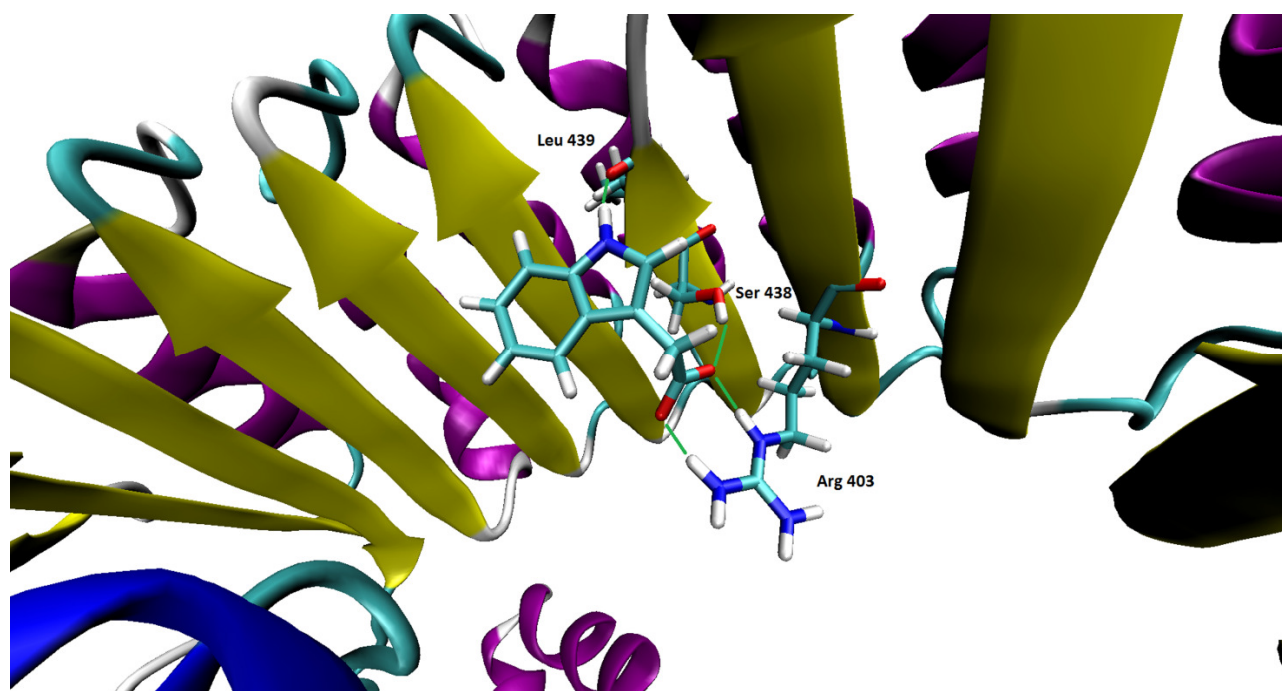

Figure S4a. Binding mode of IAA with TIR1. Hydrogen bonds are drawn as green lines.

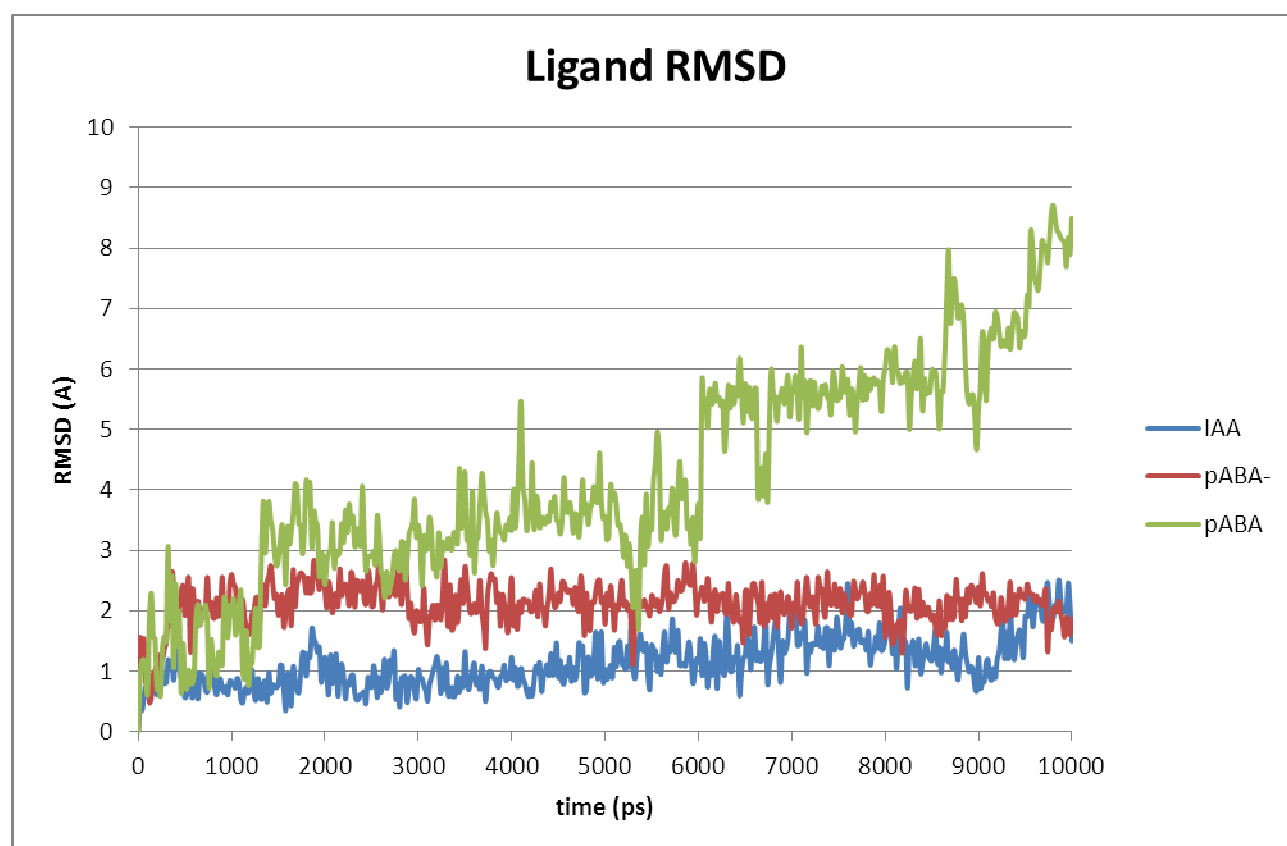

Figure S4b. Root Mean Square Deviation of the ligand with respect to the MD starting.
