# Supplementary material for: Synthesis, Crystal Structure and Biological Activity of 2-Hydroxyethylammonium Salt of p-Aminobenzoic Acid
Source: PubMed Central journal article supplement (PMC4108362; doi:10.1371/journal.pone.0101892), 2014-07-23
Supplement: pone.0101892.s005.pdf [file pone.0101892.s005.pdf]

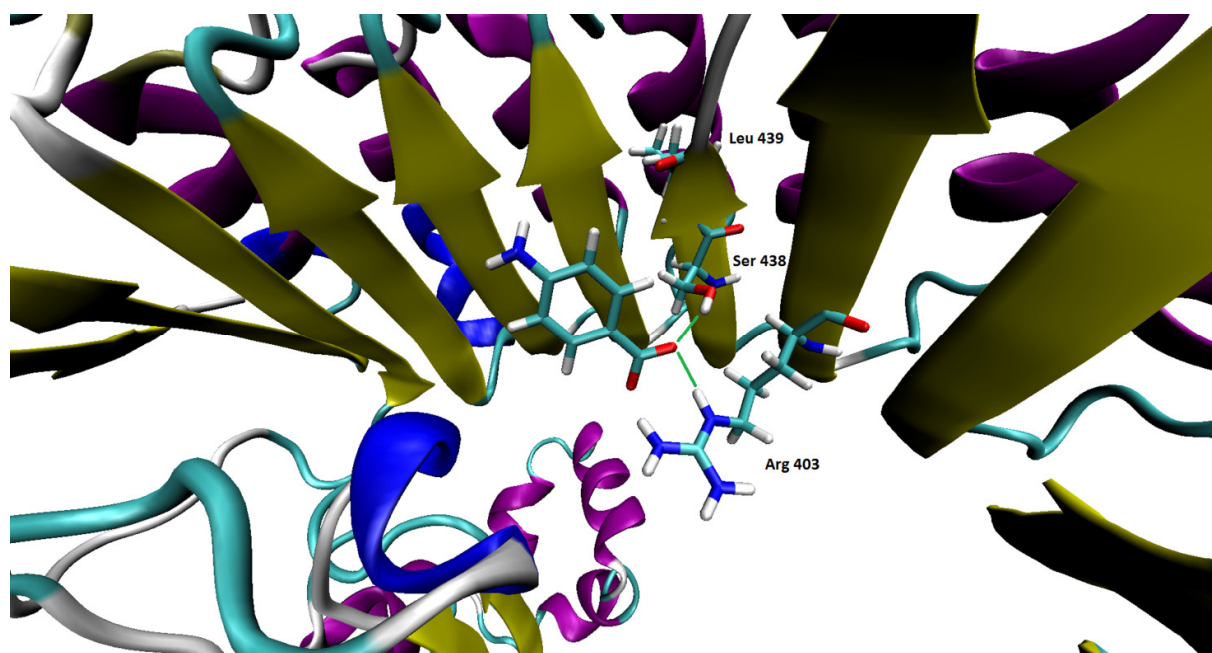

**Figure S5. Binding mode of pABA<sup>-</sup> with TIR1.** Hydrogen bonds are drawn as green lines.
