# Supplementary material for: Synthesis, Crystal Structure and Biological Activity of 2-Hydroxyethylammonium Salt of p-Aminobenzoic Acid
Source: PubMed Central journal article supplement (PMC4108362; doi:10.1371/journal.pone.0101892), 2014-07-23
Supplement: pone.0101892.s006.pdf [file pone.0101892.s006.pdf]

## HEA-pABA

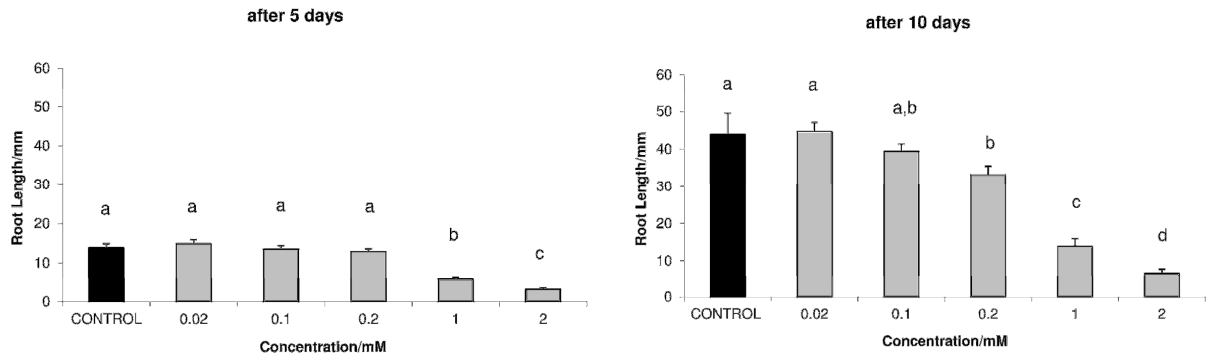

## pABA

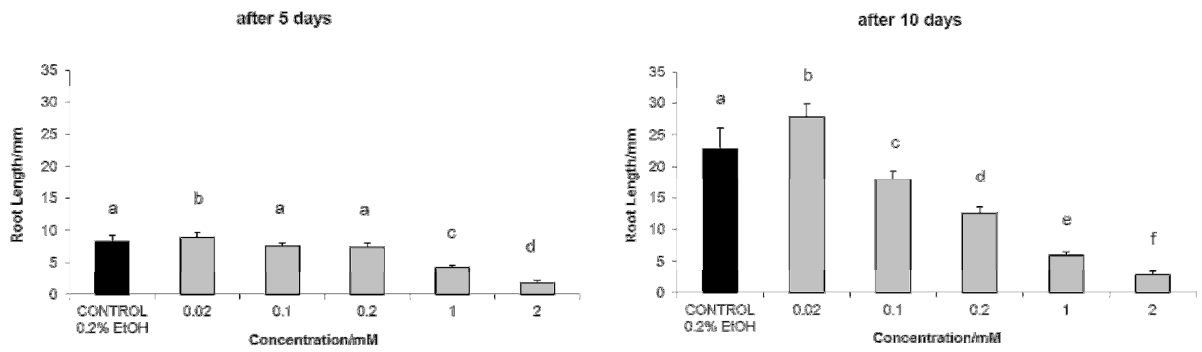

## HEA

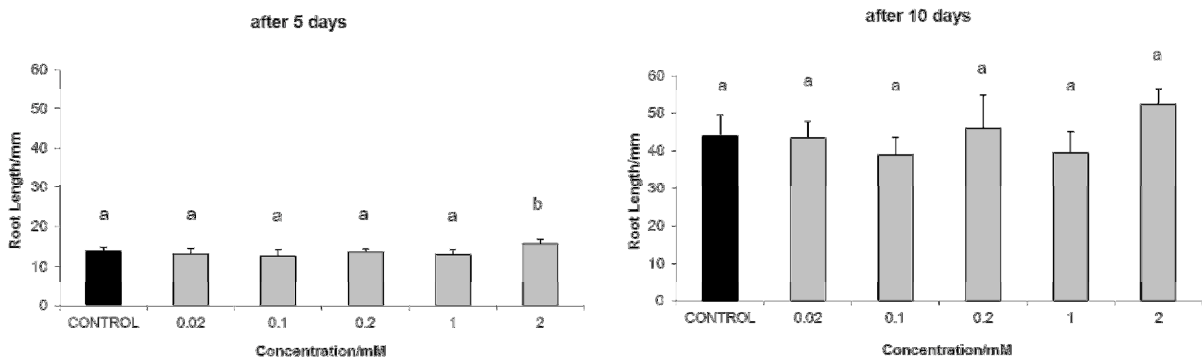

**Figure S6.** Root length (after 5 and 10 days) of treated *A. thaliana* seedlings. HEA-pABA, pABA and HEA treatments at different concentrations in comparison with control. Values with different letter annotation are significantly different (P < 0.05). Data are means  $\pm$  SE of 5 replicates.
