# Supplementary material for: Synthesis, Crystal Structure and Biological Activity of 2-Hydroxyethylammonium Salt of p-Aminobenzoic Acid
Source: PubMed Central journal article supplement (PMC4108362; doi:10.1371/journal.pone.0101892), 2014-07-23
Supplement: pone.0101892.s007.pdf [file pone.0101892.s007.pdf]

### HEA-*p*ABA

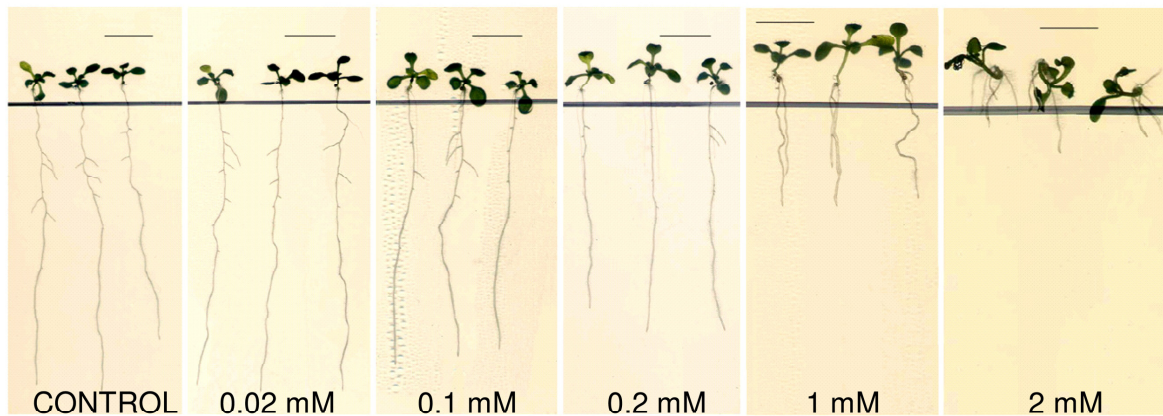

### *p*ABA

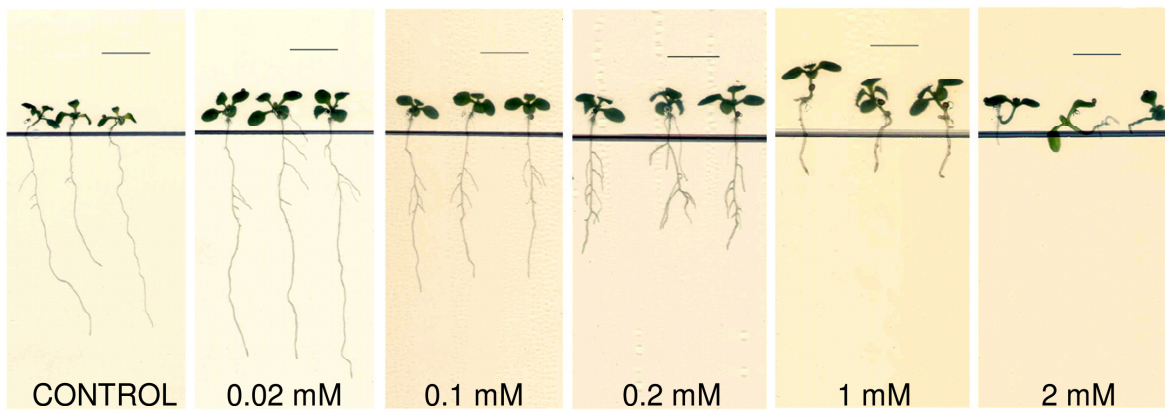

### HEA

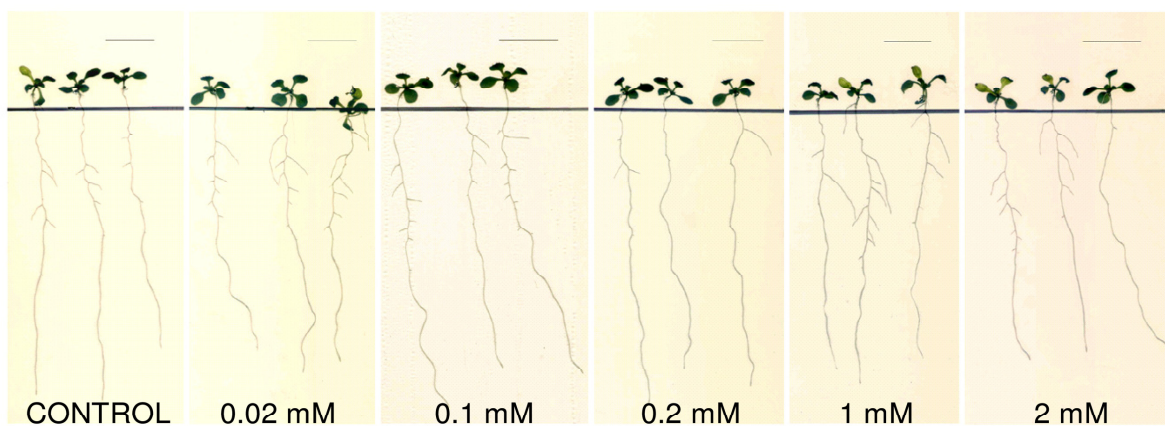

**Figure S7. Effects of HEA-*p*ABA, *p*ABA and HEA on root development of *A. thaliana* (Columbia 0) seedlings.** The 10 day old *A. thaliana* seedlings were germinated on vertical agar plates. Scale bars, 0.5 cm.
